# Supplementary material
Source: Springer Nature journal article supplement (https://www.springermedizin.de/resource/supplementary/12913_2006_372_MOESM2_ESM.pdf/9535038)

Satisfaction with Practice and Waiting Time , by Level of MD Visit Time

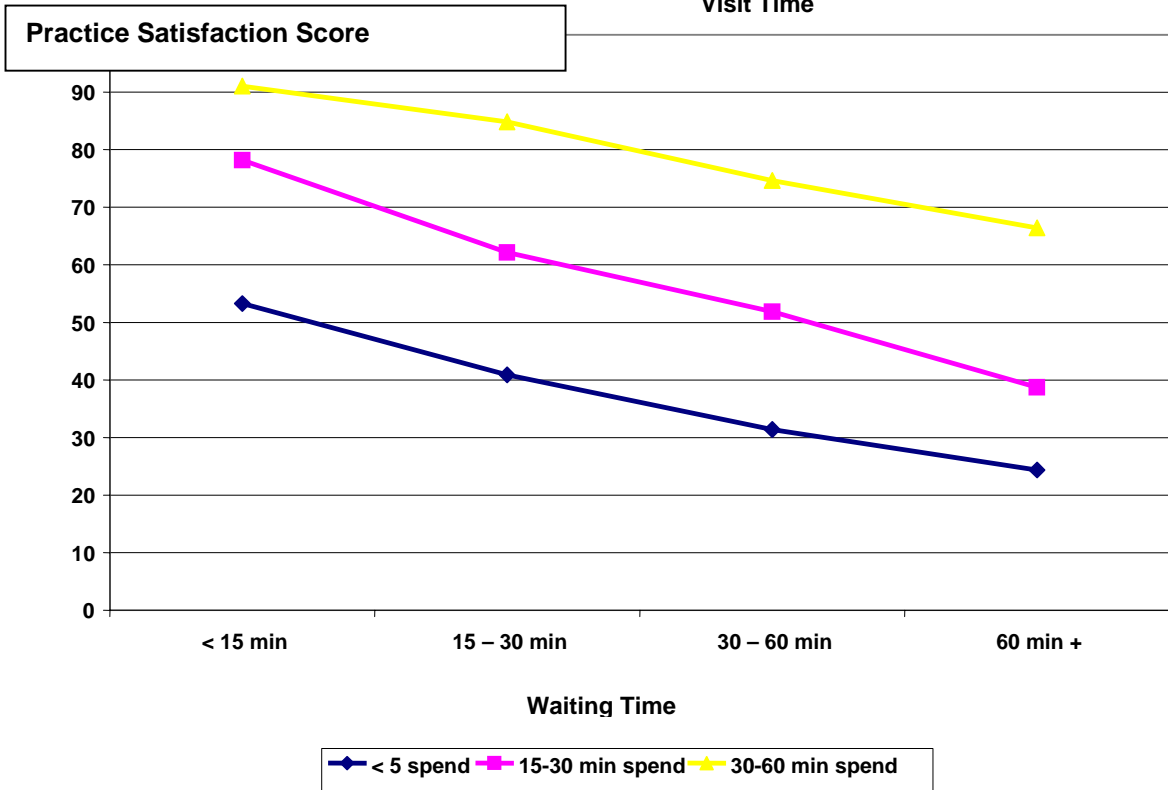

Supplement: MOESM2 [file 9535038]
